# Supplementary material for: Design and characterization of novel polymorphs of single-layered tin-sulfide for direction-dependent thermoelectric applications using first-principles approaches
Source: Royal Society of Chemistry journal article supplement (doi:10.1039/c8cp07645f), 2019-01-01
Supplement: c8cp07645f1.pdf [file c8cp07645f1.pdf]

## Designing and characterization of novel polymorphs of single-layered Tin-Sulfide for direction-dependent thermoelectric applications using first-principles approaches

Bakhtiar Ul Haq<sup>1\*</sup>, S. AlFaify<sup>1</sup>, and A. Laref<sup>2</sup>

<sup>1</sup>Advanced Functional Materials & Optoelectronics Laboratory (AFMOL), Department of Physics, Faculty of Science, King Khalid University, P.O. Box 9004, Abha, Saudi Arabia.

<sup>2</sup>Department of Physics and Astronomy, College of Science, King Saud University, Riyadh, 11451 King Saudi Arabia

---

Corresponding Authors: Email: \*bakhtiarjadoon@gmail.com (Bakhtiar Ul Haq);

The SnS monolayers particularly the  $\alpha$ -SnS,  $\gamma$ -SnS, and  $\varepsilon$ -SnS possess a high degree of anisotropy in structures. The estimated structural anisotropy in  $\alpha$ -SnS,  $\beta$ -SnS,  $\gamma$ -SnS,  $\delta$ -SnS, and  $\varepsilon$ -SnS magnitude 0.098, 0, 0.24, 0.007, and 0.36 respectively.

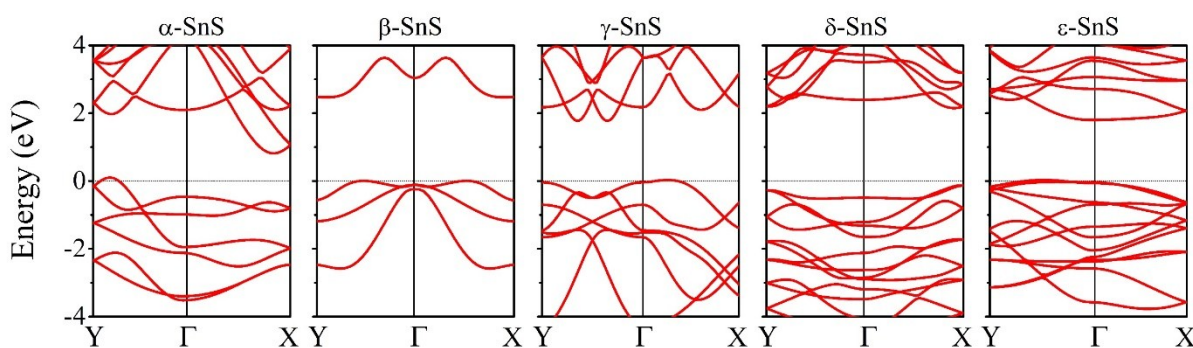

Figure S1. The electronic band structures determined with TB-mBJ potential along 100-direction ( $x$ - axis) and the 010-direction ( $y$ - axis) for  $\alpha$ -,  $\beta$ -,  $\gamma$ -,  $\delta$ - and  $\varepsilon$ - types of SnS monolayer.

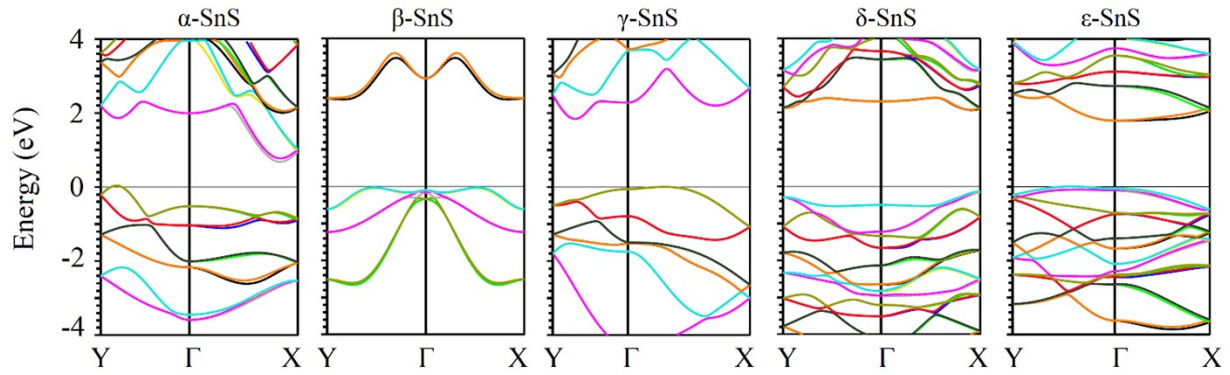

Figure S2. The electronic band structures determined with TB-mBJ+SOC along 100-direction ( $x$ -axis) and the 010-direction ( $y$ -axis) for  $\alpha$ -,  $\beta$ -,  $\gamma$ -,  $\delta$ - and  $\epsilon$ - types of SnS monolayer.

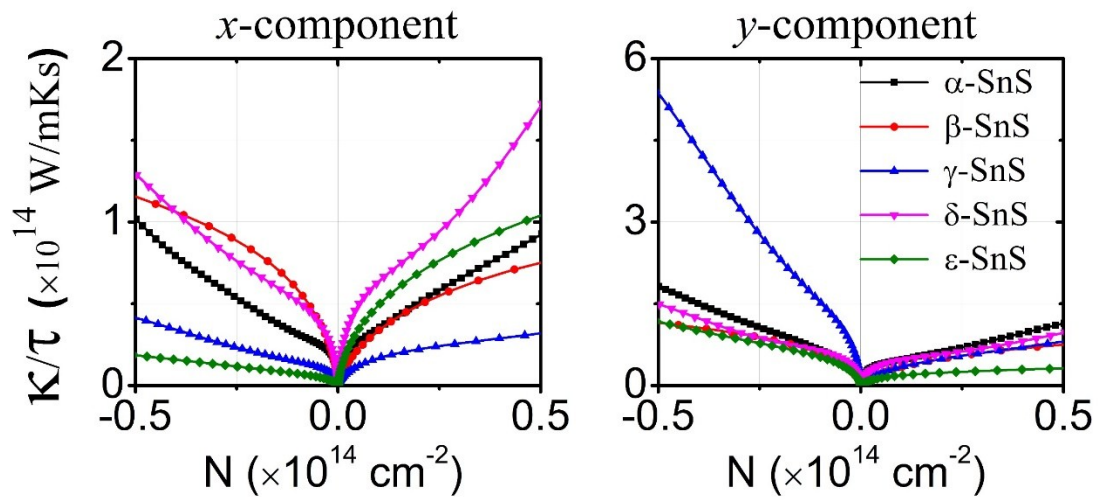

Figure S3. The dependence of  $x$ - and  $y$ - components thermal conductivity with respect to relaxation time ( $\kappa/\tau$ ) of SnS monolayers on the carrier's concentration
